# Supplementary material
Source: PubMed Central journal article supplement (PMC4194164)
Supplement: NIHMS625663-supplement-2.pdf [file NIHMS625663-supplement-2.pdf]

## **Supplemental Information**

### **Retinal injury, growth factors and cytokines converge on $\beta$ -catenin and pStat3 signaling to stimulate retina regeneration**

Jin Wan, Xiao-Feng Zhao, Anne Vojtek and Daniel Goldman

Supplemental Figures: S1-S6

Supplemental Tables: S1-S2

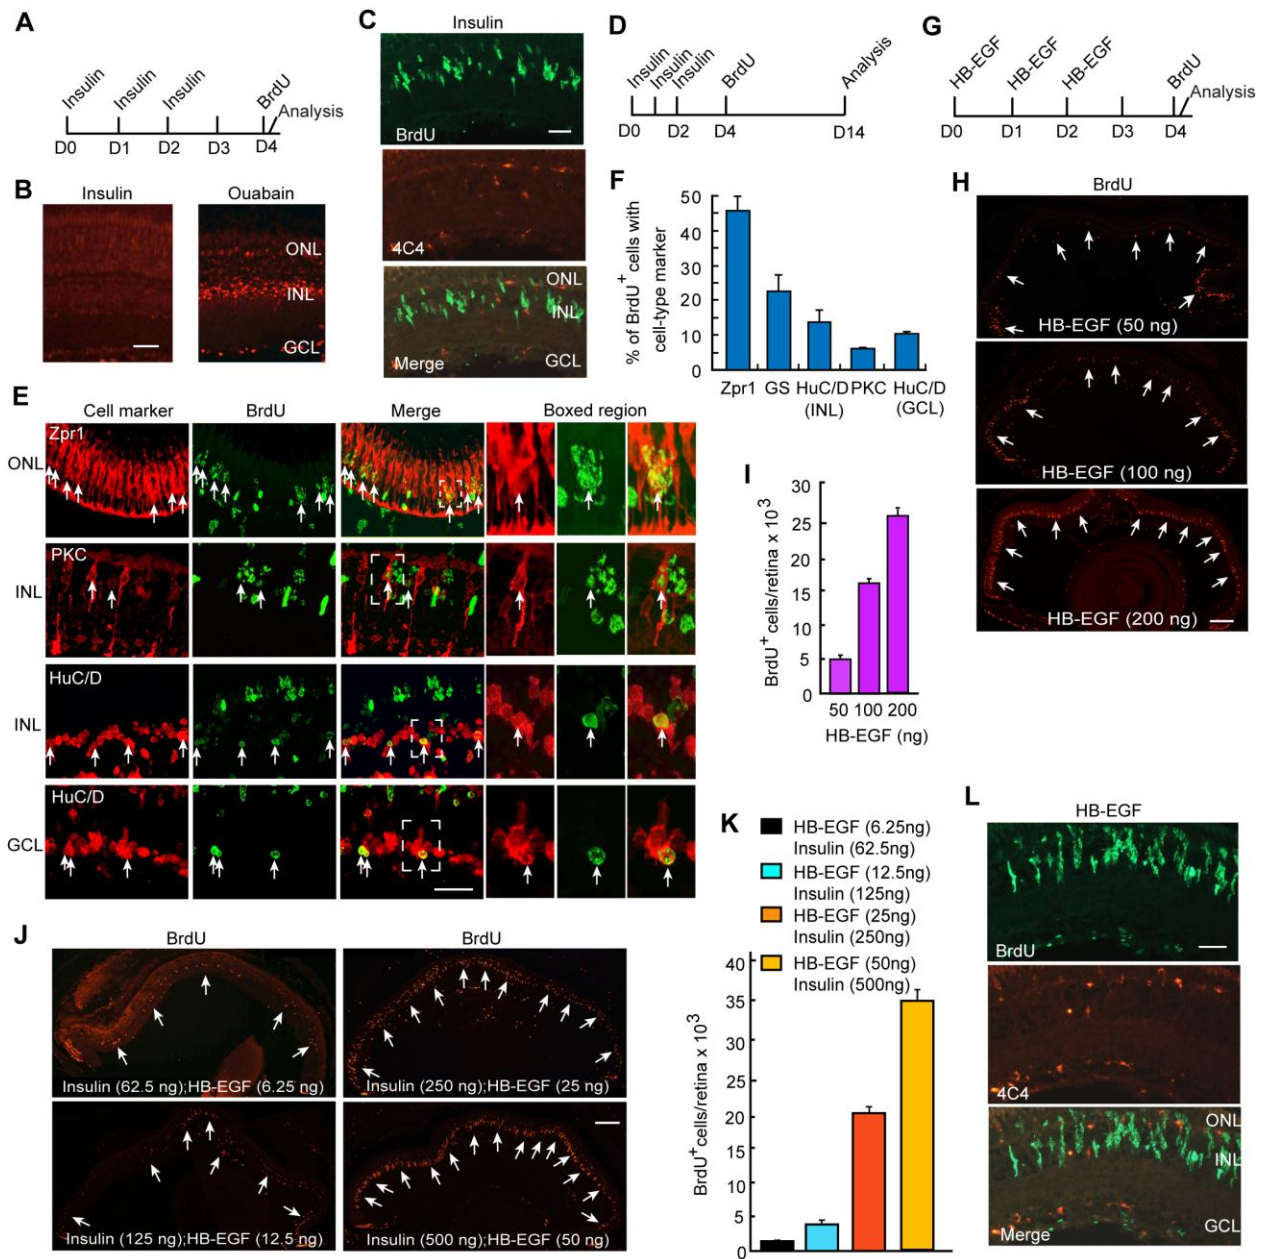

**Figure S1, related to Figures 1 and 2. Insulin and HB-EGF act in a synergistic fashion to stimulate the production multipotent progenitors in the uninjured retina.** (A) Diagram of the experimental protocol used for intravitreal Insulin injection used in (B & C). (B) TUNEL assay shows no detectable apoptosis in the Insulin-treated retina. Scale bar is 50  $\mu$ m. (C) Immunofluorescence using anti-BrdU and anti-4C4 antibodies to detect proliferating cells and microglia, respectively, shows microglia do not proliferate in the uninjured retina treated with 2

$\mu\text{g}$  of Insulin. Scale bar is  $50\ \mu\text{m}$ . (D) Diagram of experimental protocol used for lineage tracing shown in (E). (E) Immunofluorescence using anti-BrdU and anti-retinal cell type-specific antibodies identifies MG-derived progenitors that differentiated into retinal neurons in Insulin-treated eyes. Arrows point to double-labelled cells. Boxed areas are enlarged in the 3 right-hand panels. Scale bar is  $50\ \mu\text{m}$ . (F) Quantification of newly generated lineage-traced cells shown in (E). Error bars are SD;  $n=3$ . (G) Diagram of experimental protocol used for intravitreal injection of HB-EGF into the uninjured retina and shown in (H, L). (H, I) Intravitreal injection of HB-EGF stimulates MG proliferation in a concentration-dependent manner in the uninjured retina. Arrows (H) point to BrdU<sup>+</sup> MG-derived progenitors. Scale bar is  $150\ \mu\text{m}$ . Error bars (I) are SD;  $n=3$ . (J, K) Intravitreal injection of Insulin and HB-EGF act in a synergistic fashion to stimulate MG proliferation in a concentration-dependent manner. Arrows (J) point to BrdU<sup>+</sup> MG-derived progenitors. Scale bar is  $150\ \mu\text{m}$ . Error bars (K) are SD;  $n=3$ . (L) Immunofluorescence using anti-BrdU and anti-4C4 antibodies to detect proliferating cells and microglia, respectively, show microglia do not proliferate in the uninjured retina treated with  $200\ \text{ng}$  HB-EGF. Scale bar is  $50\ \mu\text{m}$ .

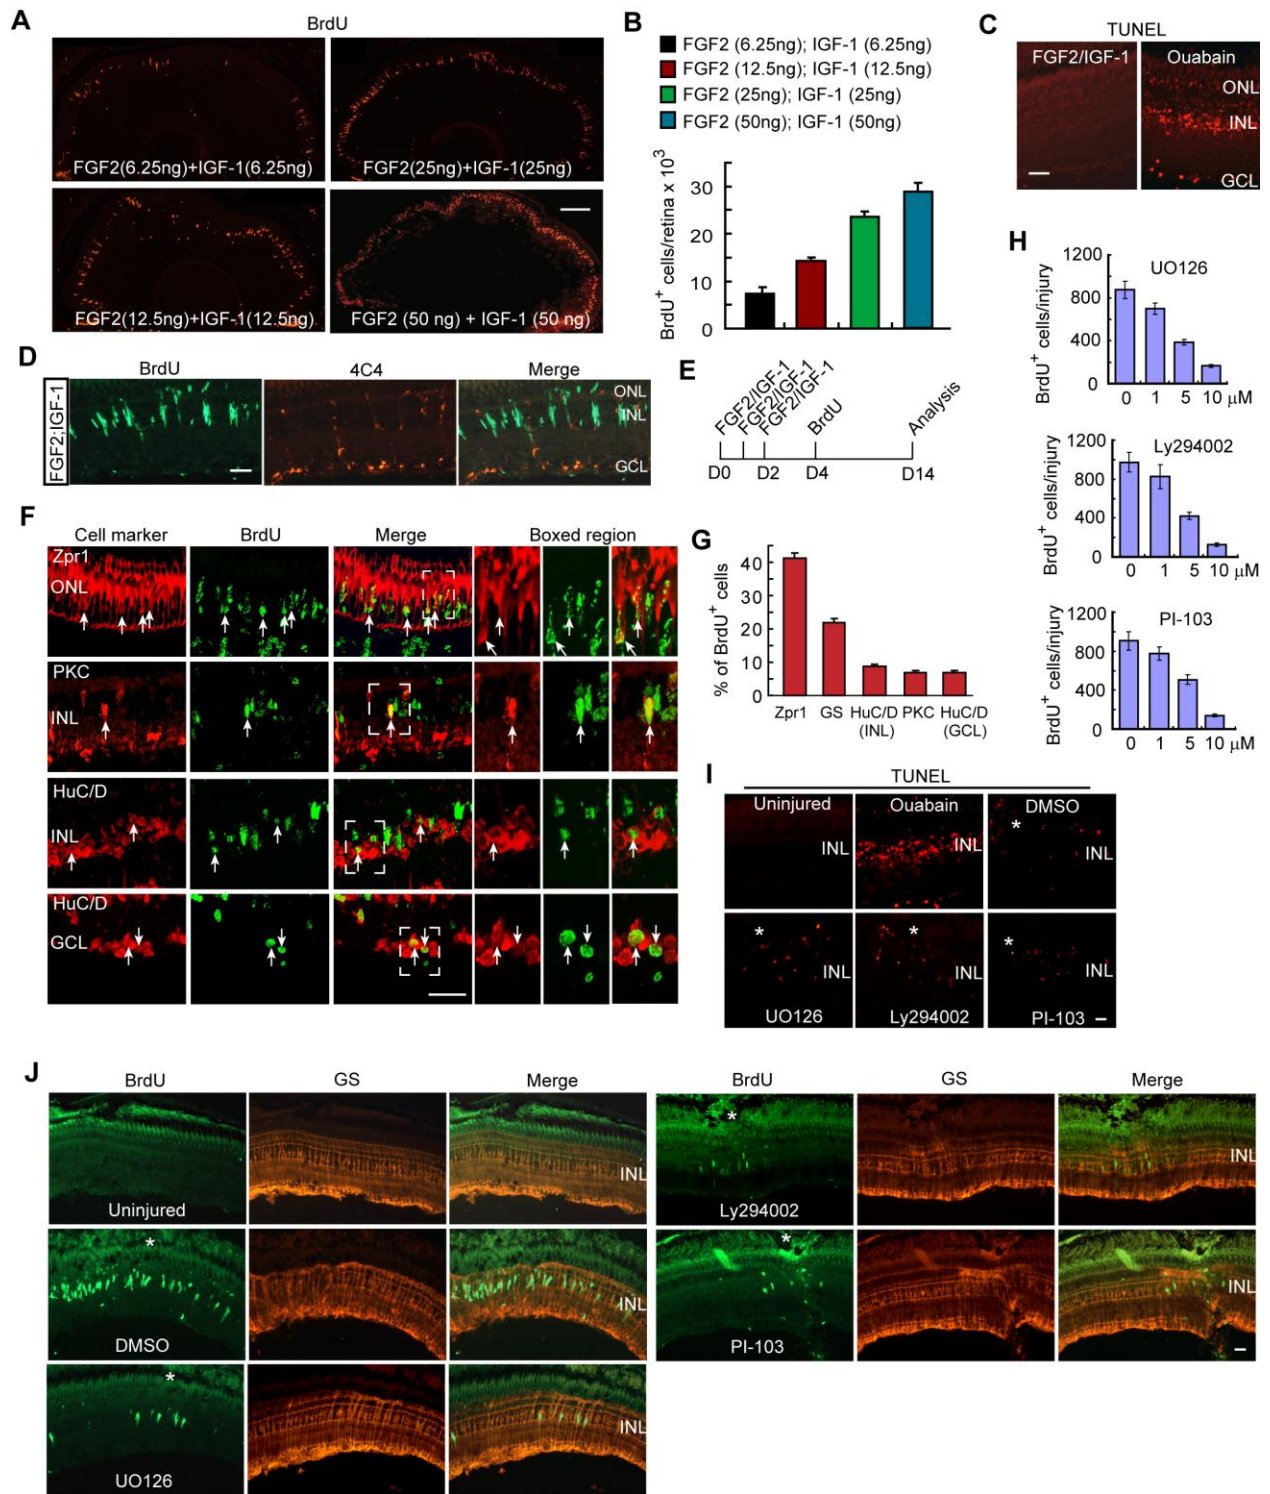

**Figure S2, related to Figures 2 and 3. FGF2 and IGF-1 act in a synergistic fashion to stimulate production of multipotent progenitors in the uninjured retina. (A, B) Intravitreal injection of FGF2 and IGF-1 synergistically stimulate MG proliferation in a concentration-**

dependent manner. Scale bar (A) is 150  $\mu\text{m}$ . Error bars (B) are SD; n=3. (C) TUNEL assay shows no detectable apoptosis in the FGF2/IGF-1-treated retina. Scale bar is 50  $\mu\text{m}$ . (D) Immunofluorescence using anti-BrdU and anti-4C4 antibodies to detect proliferating cells and microglia, respectively, show microglia do not proliferate in the uninjured retina treated with 400 ng FGF2 + 400 ng IGF-1. Scale bar is 50  $\mu\text{m}$ . (E) Diagram of the experimental protocol used for lineage tracing shown in (F). (F, G) Immunofluorescence using anti-BrdU and anti-retinal cell type-specific antibodies identifies MG-derived progenitors that differentiated into retinal neurons and glia in FGF2;IGF-1-treated eyes. Scale bar (F) is 50  $\mu\text{m}$ . Error bars (G) are SD; n=3. (H) Concentration-dependent inhibition of MG proliferation in injured retinas treated with Mapk inhibitor (UO126) or PI3K inhibitors (Ly294002 and PI-103). (I) TUNEL stain shows Mapk and PI3K inhibitors have little effect on injury-induced cell death. Scale bar is 50  $\mu\text{m}$ . (J) Immunofluorescence using anti-BrdU and anti-GS antibodies shows normal MG numbers and morphology, but reduced MG proliferation after treating injured retinas with Mapk (UO126) and PI3K (Ly294002 and PI-103) inhibitors. Scale bar is 50  $\mu\text{m}$ . Asterisks mark injury sites.

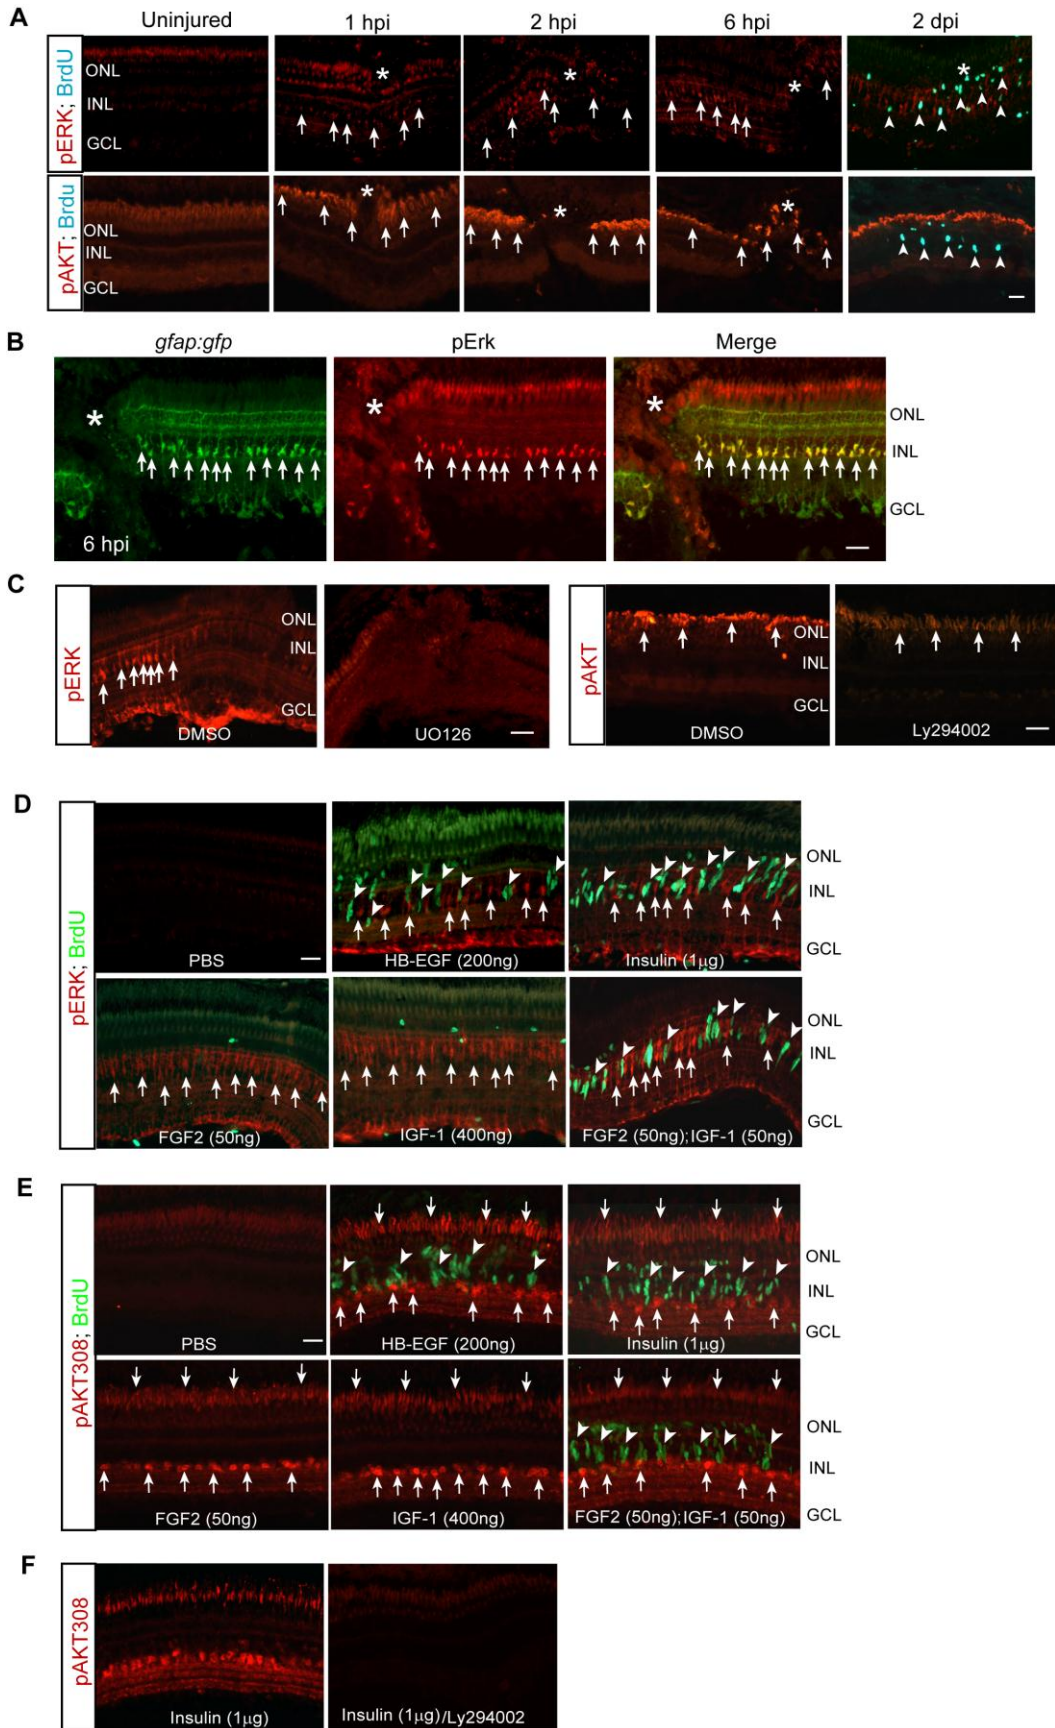

**Figure S3, related to Figure 3. pErk and pAkt expression in the injured and growth factor-treated uninjured retina.** (A) pErk, pAkt and BrdU immunofluorescence at various times post retinal injury. Asterisk identifies the injury site. Arrows point to pErk<sup>+</sup> and pAkt<sup>+</sup> cells; arrowheads point to BrdU<sup>+</sup> cells. Scale bar is 50  $\mu\text{m}$ . (B) Retinal injury in *gfap:gfp* transgenic fish shows essentially all GFP<sup>+</sup> MG express pErk at 6 hpi. Arrows point to double-labeled cells. Asterisk identifies the injury site. Scale bar is 50  $\mu\text{m}$ . (C) Injury-dependent pERK expression is suppressed by treating retinas with the Mapk inhibitor UO126 and injury-dependent pAKT expression is suppressed by treating retinas with the PI3K inhibitor LY294002. Scale bar is 50  $\mu\text{m}$ . (D) pErk and BrdU immunofluorescence shows that BrdU<sup>+</sup> progenitors do not co-label with pErk in the HB-EGF, Insulin or FGF2/IGF-1 treated uninjured retina. Arrows point to pErk<sup>+</sup> cells; arrowheads point to BrdU<sup>+</sup> cells. Scale bar is 50  $\mu\text{m}$ . (E) pAkt and BrdU immunofluorescence shows that BrdU<sup>+</sup> progenitors do not co-label with pAkt in the HB-EGF, Insulin, FGF2/IGF-1 treated uninjured retina. Arrows point to pAkt<sup>+</sup> cells; arrowheads point to BrdU<sup>+</sup> cells. Scale bar is 50  $\mu\text{m}$ .

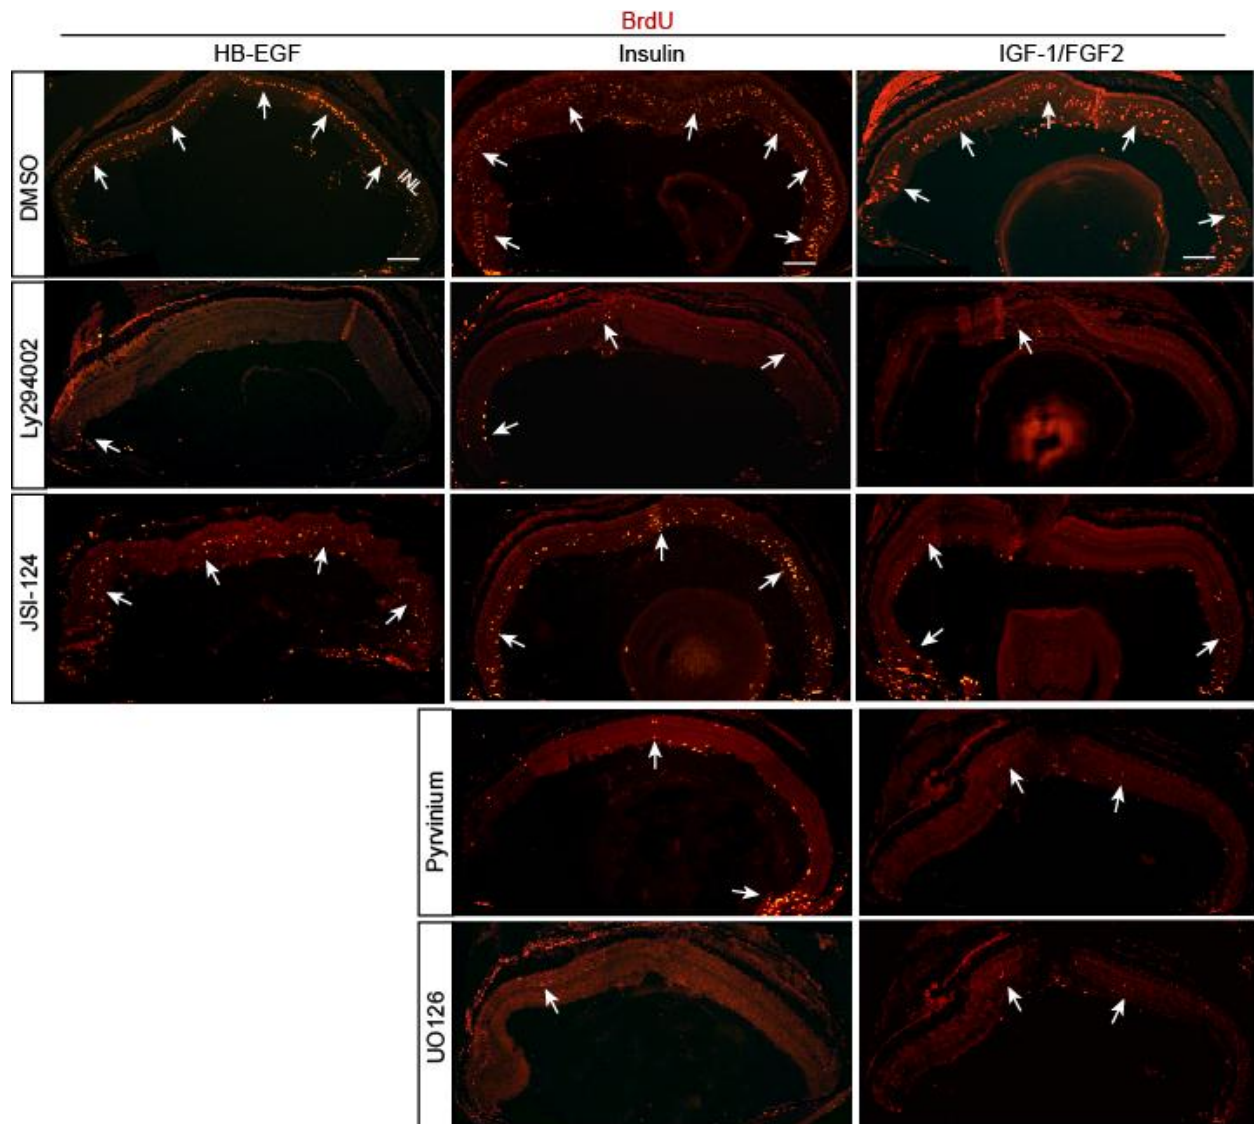

**Figure S4, related to Figure 3. HB-EGF, Insulin and IGF-1/FGF2 stimulate Müller glia proliferation via Mapk/Erk, PI3K,  $\beta$ -catenin and Jak/Stat signaling pathways.** BrdU immunofluorescence shows that Insulin or IGF-1/FGF2-dependent MG proliferation is suppressed by the Mapk inhibitor, UO126; the PI3K inhibitor, Ly294002; the Jak/Stat inhibitor, JSI-124 and the  $\beta$ -catenin inhibitor, pyvinium. Also shown is inhibition of HB-EGF-dependent MG proliferation by the PI3K inhibitor, Ly294002; the Jak/Stat inhibitor, JSI-124 (See Figure 3E and Wan et al., 2012 for effects of inhibiting the Mapk and  $\beta$ -catenin signaling pathways on HB-EGF-induced MG proliferation). Arrows point to BrdU<sup>+</sup> cells. Scale bar is 150  $\mu$ m.



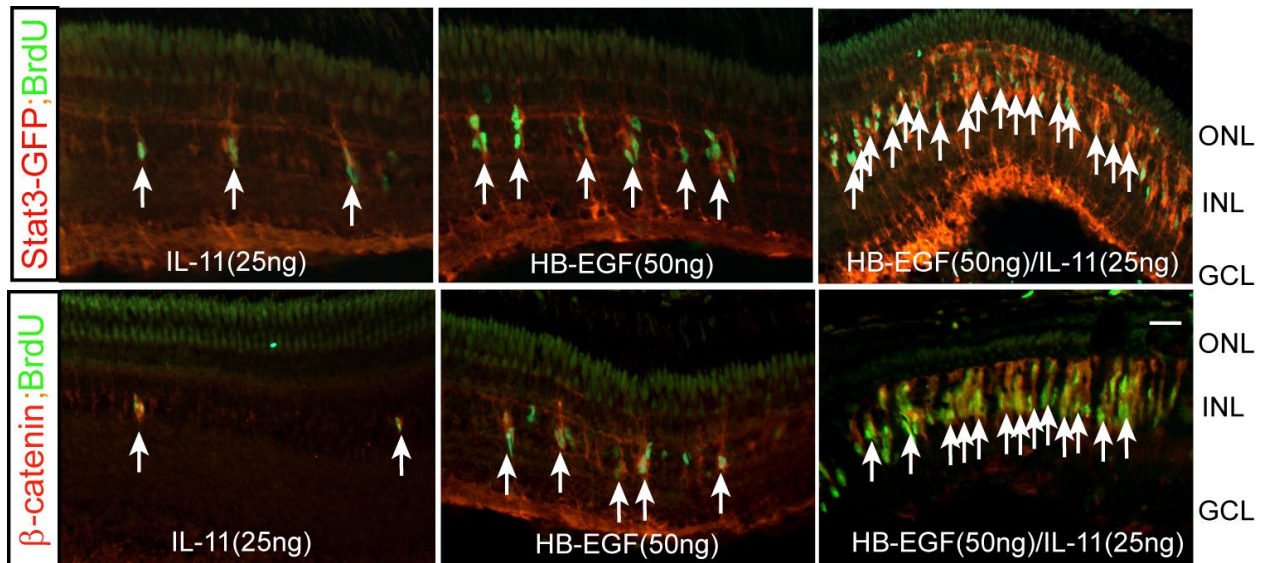

**Figure S5, related to Figure 5. Activated Stat3-GFP and  $\beta$ -catenin are localized to proliferating Müller glia-derived progenitors in the IL-11 and HB-EGF treated retina. HB-EGF and IL-11 synergize with each other to stimulate the generation of BrdU<sup>+</sup> progenitors and the accumulation of Stat3-GFP and  $\beta$ -catenin in the uninjured retina of *gfap:stat3-gfp* transgenic fish. In this figure we used a secondary antibody coupled to a red fluor to detect Stat3-GFP and  $\beta$ -catenin expression. Note that the immunofluorescence observed in the photoreceptor layer of Figures 4 and 5 does not appear, suggesting it is a non-specific signal. Importantly, the specific Stat3-GFP and  $\beta$ -catenin immunofluorescence observed in BrdU<sup>+</sup> progenitors is retained. Scale bar is 50  $\mu$ m.**

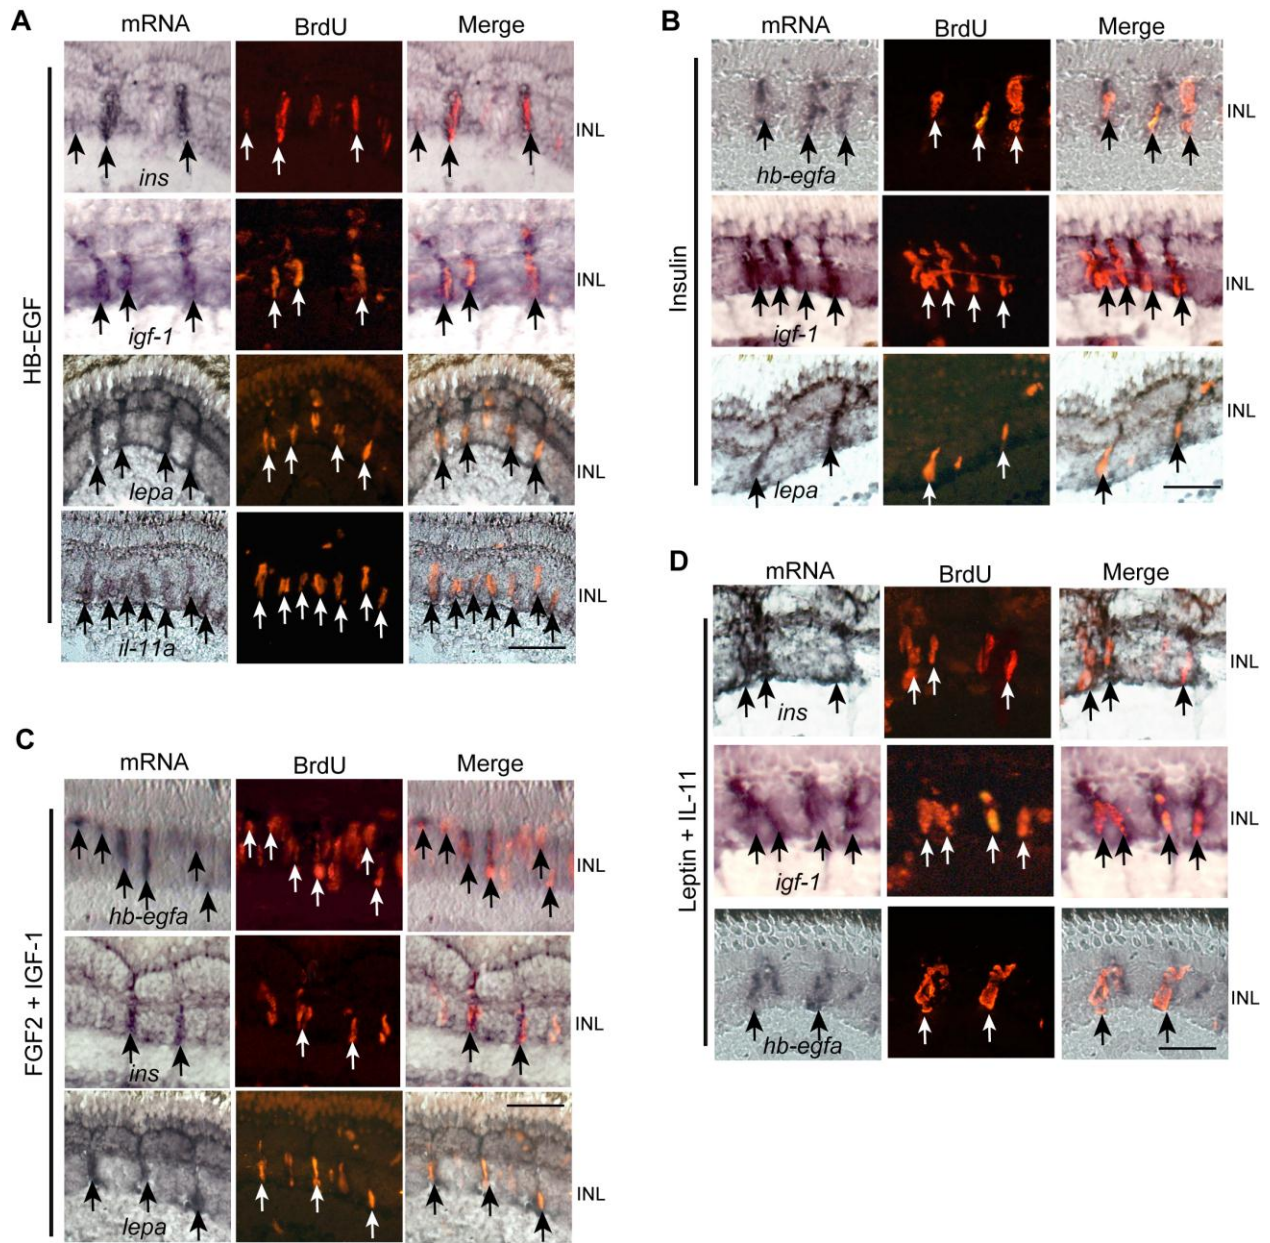

**Figure S6, related to Figure 6. Growth factors and cytokines stimulate growth factor and cytokine gene expression in Müller glia-derived progenitors.** In the uninjured retina treated with HB-EGF (A), Insulin (B), FGF2/IGF-1 (C) or Leptin/IL-11, *in situ* hybridization assays show that the indicated mRNAs were induced in proliferating MG-derived progenitors. Arrows point to BrdU<sup>+</sup> cells expressing the indicated mRNA. Scale bar is 50  $\mu$ m.

**Table S1, related to Experimental Procedures. Primers used in this study.**

| <b>Gene</b>               | <b>Primers for Real-time PCR</b>                         |
|---------------------------|----------------------------------------------------------|
| <i>insra</i>              | F 5' AAAGAGGCGGAAGAGACG<br>R 5' CCATTGGGGAGTGAGGAG       |
| <i>insrb</i>              | F 5' GTTTTTCAACTACGCCCTAG<br>R 5' CGATATAATTGTCCTCCACC   |
| <i>ins</i>                | F 5' TCTACAACCCCAAGAGAGACG<br>R 5' AAAACAAACGGAGAGCATTAA |
| <i>igf1ra</i>             | F 5' AGCACTCAGGACAGGTAGCG<br>R 5'GACAAAGGGAGGAGGGAAAT    |
| <i>igf1rb</i>             | F 5' ACCTACTACGTGCTCCGCT<br>R 5' GGGTTTTGTCTCGTCCTCC     |
| <i>Igfbp3</i>             | F 5' AAGGGGGACGTGTGAACAT<br>R 5'GGCAGAAACAAGAATTGGG      |
| <i>Igf-1</i>              | F 5' CAATGGAACAAAGTCGGA<br>R 5' GCACAGCACCAGTGAGAG       |
| <b>Gene</b>               | <b>Primers for PCR</b>                                   |
| <i>Igf-1</i>              | F 5' TCCAAATCCGTCTCCTGTTC<br>R 5' ATCCTCCCGCTGTCCTCTA    |
| <i>ins</i>                | F 5' ACCATTCCCTCGCCTCTGCTT<br>R 5' GGGGCTCAACGTCTCTCTTG  |
| <i>hb-egf<sub>a</sub></i> | F 5'CTGTGATTGATTTATTGGAGG<br>R 5'GTCTGGTTTAGTGGTGTGGAG   |
| <i>leptina</i>            | F 5' TTTCCAGCTCTCCGCTCAACC<br>R 5' CGGCGTATCTGGTCAACATGC |

|               |                                                                                                                        |
|---------------|------------------------------------------------------------------------------------------------------------------------|
| <i>wnt4a</i>  | F 5' CAATGCGAGCAACTGGCTATAC<br>R 5' AATGCAGCTTCCCTCGTACCTT                                                             |
| <i>wnt8b</i>  | F 5' GGCTCACATGAAGACTTGCTGC<br>R 5' CAGCAGAACTGATGGCATGGA                                                              |
| <i>il-11a</i> | F 5' CTCCTCATCGCTGCTTCTCTCG<br>R 5' TTGCGAAGTCACTGGCTCTGC                                                              |
|               | <b>Primers for amplifying <i>in situ</i> hybridization probes</b>                                                      |
| <i>igf-1</i>  | T7F:5' TGAATTGTAATACGACTCACTATAGGGCTCTCTACGAGCACAACGACACA<br>T3R:5' AAGCTCGAAATTAACCCTCACTAAAGGGGGCTTTTGAATAATCCCCTTTG |

**Table S2. ED<sub>50</sub> and intravitreal concentration of recombinant mammalian growth factors and cytokines. Related to Experimental Procedures.**

| Growth factor cytokine    | ED <sub>50</sub>                                                                                                                                                                                                                            | Estimated concentration after intravitreal injection* |
|---------------------------|---------------------------------------------------------------------------------------------------------------------------------------------------------------------------------------------------------------------------------------------|-------------------------------------------------------|
| Recombinant human HB-EGF  | ED <sub>50</sub> : 0.15-0.75 ng/ml. (Rubin, J.S. et al. Proc Natl Acad Sci USA 88:415, 1991; <a href="http://www.rndsystems.com/Products/259-HE">http://www.rndsystems.com/Products/259-HE</a> ).                                           | 50 ng = 257 nM<br>200 ng = 1.03 μM                    |
| Recombinant human Insulin | ED <sub>50</sub> : 0.03-0.15 μg/ml. (Levy et al., Endocrinology 119:1786, 1986; Backer et al., J Cell Biol 115:1535, 1991; <a href="http://www.rndsystems.com/Products/1544-IR">http://www.rndsystems.com/Products/1544-IR</a> ).           | 500 ng = 225 nM<br>2 μg = 900 nM                      |
| Recombinant human FGF-2   | ED <sub>50</sub> : 0.1-0.6 ng/ml (Raines, E.W. et al. Methods Enzymol. 109:749, 1985; Zeytin and Delellis Endocrinology 121:352, 1987; <a href="http://www.rndsystems.com/Products/233-FB">http://www.rndsystems.com/Products/233-FB</a> ). | 50 ng = 140 nM<br>400 ng = 1.12 μM                    |
| Recombinant human IGF-1   | ED <sub>50</sub> :0.3-1.5 ng/ml (Karey, K.P. et al. Cancer Research 48:4083, 1988; Tollefsen et al., J Clin Invest 87:1241, 1991; <a href="http://www.rndsystems.com/Products/291-G1">http://www.rndsystems.com/Products/291-G1</a> ).      | 50 ng = 320 nM                                        |
| Recombinant mouse IL-11   | ED <sub>50</sub> ~5 ng/ml in a cell proliferation assay (Hilton et al., EMBO J. 13:4765, 1994; <a href="http://www.rndsystems.com/Products/418-ML">http://www.rndsystems.com/Products/418-ML</a> ).                                         | 25 ng = 65.3 nM<br>100 ng = 2.6 μM                    |
| Recombinant human Leptin  | ED <sub>50</sub> ~0.4-2 ng/ml in a cell proliferation assay ( <a href="http://www.rndsystems.com/Products/398-LP">http://www.rndsystems.com/Products/398-LP</a> ).                                                                          | 62.5 ng = 0.195 μM<br>1 μg = 3.125 μM                 |

\*Cytokine concentrations in the vitreous of injected eyes was estimated as previously described using a 20 μl vitreal volume (Fimbel et al., J Neurosci 27:1712, 2007; Ritchey et al., Exp Eye Res 99:1, 2012; Raymond et al., J Neurobiol 19:431, 1988).
